# Supplementary material for: First Identification of 5,11-Dideoxytetrodotoxin in Marine Animals, and Characterization of Major Fragment Ions of Tetrodotoxin and Its Analogs by High Resolution ESI-MS/MS
Source: MDPI journal article supplement (doi:10.3390/md11082799), 2013-08-06
Supplement: s1 [file s1]

marinedrugs-11-02799-s001.mol
  corina  04141402573D 1   1.00000     0.00000 
CORINA 3.49 0023  12.04.2013
 30 33  0  0  0  0  0  0  0  0999 V2000
   -0.0168    1.3850    0.0097 C   0  0  0  0  0  0  0  0  0  0  0  0
    0.0021   -0.0041    0.0020 N   0  0  0  0  0  0  0  0  0  0  0  0
    0.9740   -0.6489   -0.8855 C   0  0  0  0  0  0  0  0  0  0  0  0
    2.3549   -0.0258   -0.6467 C   0  0  0  0  0  0  0  0  0  0  0  0
    2.2634    1.4848   -0.8791 C   0  0  0  0  0  0  0  0  0  0  0  0
    1.2129    2.0247    0.0014 N   0  0  0  0  0  0  0  0  0  0  0  0
    1.0454   -2.1519   -0.6209 C   0  0  0  0  0  0  0  0  0  0  0  0
    3.3589   -0.6530   -1.6153 C   0  0  0  0  0  0  0  0  0  0  0  0
    3.4420   -2.1582   -1.3223 C   0  0  0  0  0  0  0  0  0  0  0  0
    2.0625   -2.7755   -1.5847 C   0  0  0  0  0  0  0  0  0  0  0  0
    0.5732   -0.4166   -2.3466 C   0  0  0  0  0  0  0  0  0  0  0  0
    1.6827   -2.4759   -2.9317 O   0  0  0  0  0  0  0  0  0  0  0  0
    2.9030   -0.4795   -2.9602 O   0  0  0  0  0  0  0  0  0  0  0  0
    1.6349   -1.0798   -3.2346 C   0  0  0  0  0  0  0  0  0  0  0  0
    3.2189    1.9518   -0.6403 H   0  0  0  0  0  0  0  0  0  0  0  0
    1.3062   -0.8986   -4.6135 O   0  0  0  0  0  0  0  0  0  0  0  0
   -0.5997   -0.5230    0.5583 H   0  0  0  0  0  0  0  0  0  0  0  0
    1.3614   -2.3272    0.4074 H   0  0  0  0  0  0  0  0  0  0  0  0
    2.6682   -0.2178    0.3795 H   0  0  0  0  0  0  0  0  0  0  0  0
    4.4118   -2.7632   -2.1799 O   0  0  0  0  0  0  0  0  0  0  0  0
    2.1061   -3.8554   -1.4429 H   0  0  0  0  0  0  0  0  0  0  0  0
    4.3388   -0.1939   -1.4838 H   0  0  0  0  0  0  0  0  0  0  0  0
    1.9278    1.7428   -2.2439 O   0  0  0  0  0  0  0  0  0  0  0  0
   -0.7044   -1.0055   -2.5976 O   0  0  0  0  0  0  0  0  0  0  0  0
    0.5346    0.6529   -2.5533 H   0  0  0  0  0  0  0  0  0  0  0  0
    1.3764    2.8025    0.5574 H   0  0  0  0  0  0  0  0  0  0  0  0
   -1.1355    2.0537    0.0187 N   0  3  0  0  0  0  0  0  0  0  0  0
   -0.2408   -2.7372   -0.8332 O   0  0  0  0  0  0  0  0  0  0  0  0
    3.8361   -2.3783    0.1396 C   0  0  0  0  0  0  0  0  0  0  0  0
    3.9119   -3.7800    0.4066 O   0  0  0  0  0  0  0  0  0  0  0  0
  1  2  1  0      
  2  3  1  0      
  3  4  1  0      
  4  5  1  0      
  5  6  1  0      
  6  1  1  0      
  3  7  1  0      
  4  8  1  0      
  8  9  1  0      
 10  9  1  0      
  3 11  1  0      
 10 12  1  0      
  8 13  1  0      
 12 14  1  0      
 13 14  1  0      
  5 15  1  0      
 14 11  1  0      
 14 16  1  0      
  2 17  1  0      
  7 18  1  0      
  4 19  1  0      
 10  7  1  0      
  9 20  1  0      
 21 10  1  0      
 22  8  1  0      
 23  5  1  0      
 11 24  1  0      
 11 25  1  0      
 26  6  1  0      
  1 27  2  0      
 28  7  1  0      
  9 29  1  0      
 29 30  1  0      
M  CHG  1  27   1
M  STY  1   1 SUP
M  SLB  1   1   1
M  SAL   1  2  29  30
M  SBL   1  1  32
M  SMT   1 CH2OH
M  SBV   1 32   -6.8006    6.4624
M  END
$$$$
