# Supplementary material for: First Identification of 5,11-Dideoxytetrodotoxin in Marine Animals, and Characterization of Major Fragment Ions of Tetrodotoxin and Its Analogs by High Resolution ESI-MS/MS
Source: MDPI journal article supplement (doi:10.3390/md11082799), 2013-08-06
Supplement: s5 [file s5]

marinedrugs-11-02799-s003.mol
  corina  04141402573D 1   1.00000     0.00000 
CORINA 3.49 0023  12.04.2013
 29 33  0  0  0  0  0  0  0  0999 V2000
   -0.0168    1.3851    0.0097 C   0  0  0  0  0  0  0  0  0  0  0  0
    0.0021   -0.0041    0.0020 N   0  0  0  0  0  0  0  0  0  0  0  0
    1.1058   -0.6815    0.6875 C   0  0  0  0  0  0  0  0  0  0  0  0
    2.4304   -0.0414    0.1982 C   0  0  0  0  0  0  0  0  0  0  0  0
    2.2531    1.3649    0.8539 C   0  0  0  0  0  0  0  0  0  0  0  0
    1.2203    2.0262    0.0013 N   0  0  0  0  0  0  0  0  0  0  0  0
    1.0803   -2.1750    0.5056 C   0  0  0  0  0  0  0  0  0  0  0  0
    3.6096   -0.7321    0.8878 C   0  0  0  0  0  0  0  0  0  0  0  0
    3.5578   -2.2408    0.6292 C   0  0  0  0  0  0  0  0  0  0  0  0
    2.2704   -2.8020    1.2443 C   0  0  0  0  0  0  0  0  0  0  0  0
    1.1460   -0.2547    2.1699 C   0  0  0  0  0  0  0  0  0  0  0  0
    2.1908   -2.4133    2.6186 O   0  0  0  0  0  0  0  0  0  0  0  0
    3.5243   -0.5235    2.3040 O   0  0  0  0  0  0  0  0  0  0  0  0
    2.2948   -1.0147    2.8576 C   0  0  0  0  0  0  0  0  0  0  0  0
    1.5731    1.1287    2.1090 O   0  0  0  0  0  0  0  0  0  0  0  0
    2.2698   -0.7660    4.2646 O   0  0  0  0  0  0  0  0  0  0  0  0
   -0.6949   -0.5105   -0.4436 H   0  0  0  0  0  0  0  0  0  0  0  0
    0.1504   -2.5744    0.9104 H   0  0  0  0  0  0  0  0  0  0  0  0
    2.5179   -0.0057   -0.8877 H   0  0  0  0  0  0  0  0  0  0  0  0
    3.5628   -2.4862   -0.7786 O   0  0  0  0  0  0  0  0  0  0  0  0
    2.2546   -3.8885    1.1586 H   0  0  0  0  0  0  0  0  0  0  0  0
    4.5462   -0.3269    0.5048 H   0  0  0  0  0  0  0  0  0  0  0  0
    3.1813    1.9298    0.9398 H   0  0  0  0  0  0  0  0  0  0  0  0
    0.1897   -0.3926    2.6744 H   0  0  0  0  0  0  0  0  0  0  0  0
    1.3952    2.8302   -0.5124 H   0  0  0  0  0  0  0  0  0  0  0  0
   -1.1350    2.0547    0.0187 N   0  3  0  0  0  0  0  0  0  0  0  0
    1.1664   -2.4866   -0.8863 O   0  0  0  0  0  0  0  0  0  0  0  0
    4.7707   -2.9140    1.2747 C   0  0  0  0  0  0  0  0  0  0  0  0
    4.7197   -4.3213    1.0319 O   0  0  0  0  0  0  0  0  0  0  0  0
  1  2  1  0      
  2  3  1  0      
  3  4  1  0      
  4  5  1  0      
  5  6  1  0      
  6  1  1  0      
  3  7  1  0      
  4  8  1  0      
  8  9  1  0      
 10  9  1  0      
  3 11  1  0      
 10 12  1  0      
  8 13  1  0      
 12 14  1  0      
 13 14  1  0      
  5 15  1  0      
 14 11  1  0      
 14 16  1  0      
  2 17  1  0      
  7 18  1  0      
  4 19  1  0      
 10  7  1  0      
  9 20  1  0      
 21 10  1  0      
 22  8  1  0      
 23  5  1  0      
 11 24  1  0      
 25  6  1  0      
  1 26  2  0      
 27  7  1  0      
 11 15  1  0      
  9 28  1  0      
 28 29  1  0      
M  CHG  1  26   1
M  STY  1   1 SUP
M  SLB  1   1   1
M  SAL   1  2  28  29
M  SBL   1  1  32
M  SMT   1 CH2OH
M  SBV   1 32   -5.4849    6.3060
M  END
$$$$
