# Supplementary material for: First Identification of 5,11-Dideoxytetrodotoxin in Marine Animals, and Characterization of Major Fragment Ions of Tetrodotoxin and Its Analogs by High Resolution ESI-MS/MS
Source: MDPI journal article supplement (doi:10.3390/md11082799), 2013-08-06
Supplement: s7 [file s7]

marinedrugs-11-02799-s004.mol
  corina  04141402583D 1   1.00000     0.00000 
CORINA 3.49 0023  12.04.2013
 30 32  0  0  0  0  0  0  0  0999 V2000
    0.3996    1.4917   -0.2222 C   0  0  0  0  0  0  0  0  0  0  0  0
    0.3523    0.1034   -0.2265 N   0  0  0  0  0  0  0  0  0  0  0  0
    1.1231   -0.6093    0.8103 C   0  0  0  0  0  0  0  0  0  0  0  0
    2.5327   -0.0154    0.8744 C   0  0  0  0  0  0  0  0  0  0  0  0
    2.4857    1.5048    1.0010 C   0  0  0  0  0  0  0  0  0  0  0  0
    1.6748    2.0334   -0.1175 N   0  0  0  0  0  0  0  0  0  0  0  0
    0.4360   -0.4309    2.1603 C   0  0  0  0  0  0  0  0  0  0  0  0
    3.3508   -0.6596    1.9809 C   0  0  0  0  0  0  0  0  0  0  0  0
    2.6548   -0.6974    3.3338 C   0  0  0  0  0  0  0  0  0  0  0  0
    1.2187   -1.2050    3.2187 C   0  0  0  0  0  0  0  0  0  0  0  0
    1.2043   -2.0826    0.4265 C   0  0  0  0  0  0  0  0  0  0  0  0
    1.2381   -2.6099    2.8786 O   0  0  0  0  0  0  0  0  0  0  0  0
    3.6040   -1.6855    1.6829 H   0  0  0  0  0  0  0  0  0  0  0  0
    1.3249   -3.0021    1.6090 C   0  0  0  0  0  0  0  0  0  0  0  0
    2.0102    1.8109    1.9288 H   0  0  0  0  0  0  0  0  0  0  0  0
    1.5189   -4.1956    1.3922 O   0  0  0  0  0  0  0  0  0  0  0  0
   -0.1713   -0.3673   -0.8925 H   0  0  0  0  0  0  0  0  0  0  0  0
    0.4008    0.6282    2.4205 H   0  0  0  0  0  0  0  0  0  0  0  0
    3.0278   -0.2523   -0.0859 H   0  0  0  0  0  0  0  0  0  0  0  0
    3.3745   -1.6414    4.1610 O   0  0  0  0  0  0  0  0  0  0  0  0
    0.7220   -1.0786    4.1902 H   0  0  0  0  0  0  0  0  0  0  0  0
    4.2975   -0.1134    2.0860 H   0  0  0  0  0  0  0  0  0  0  0  0
    3.8053    2.0461    0.9223 O   0  0  0  0  0  0  0  0  0  0  0  0
    2.0833   -2.2248   -0.2235 H   0  0  0  0  0  0  0  0  0  0  0  0
    2.0082    2.7018   -0.7229 H   0  0  0  0  0  0  0  0  0  0  0  0
   -0.6653    2.2292   -0.3143 N   0  3  0  0  0  0  0  0  0  0  0  0
   -0.9020   -0.9333    2.0907 O   0  0  0  0  0  0  0  0  0  0  0  0
    0.0437   -2.4525   -0.3333 O   0  0  0  0  0  0  0  0  0  0  0  0
    2.7036    0.6514    4.0430 C   0  0  0  0  0  0  0  0  0  0  0  0
    4.0594    1.0943    4.1315 O   0  0  0  0  0  0  0  0  0  0  0  0
  1  2  1  0      
  2  3  1  0      
  3  4  1  0      
  4  5  1  0      
  5  6  1  0      
  6  1  1  0      
  3  7  1  0      
  4  8  1  0      
  8  9  1  0      
 10  9  1  0      
  3 11  1  0      
 10 12  1  0      
  8 13  1  0      
 12 14  1  0      
  5 15  1  0      
 14 11  1  0      
 14 16  2  0      
  2 17  1  0      
  7 18  1  0      
  4 19  1  0      
 10  7  1  0      
  9 20  1  0      
 21 10  1  0      
 22  8  1  0      
 23  5  1  0      
 11 24  1  0      
 25  6  1  0      
  1 26  2  0      
 27  7  1  0      
 11 28  1  0      
  9 29  1  0      
 29 30  1  0      
M  CHG  1  26   1
M  STY  1   1 SUP
M  SLB  1   1   1
M  SAL   1  2  29  30
M  SBL   1  1  31
M  SMT   1 CH2OH
M  SBV   1 31   -6.0211    4.8622
M  END
$$$$
