# Supplementary material for: First Identification of 5,11-Dideoxytetrodotoxin in Marine Animals, and Characterization of Major Fragment Ions of Tetrodotoxin and Its Analogs by High Resolution ESI-MS/MS
Source: MDPI journal article supplement (doi:10.3390/md11082799), 2013-08-06
Supplement: s8 [file s8]

marinedrugs-11-02799-s004.mol
  ChemDraw12271311462D

 30 32  0  0  0  0  0  0  0  0999 V2000
   -1.5138    0.3434    0.0000 C   0  0  0  0  0  0  0  0  0  0  0  0
   -1.1013   -0.3711    0.0000 N   0  0  0  0  0  0  0  0  0  0  0  0
   -0.3032   -0.1620    0.0000 C   0  0  0  0  0  0  0  0  0  0  0  0
    0.4900   -0.3711    0.0000 C   0  0  0  0  0  0  0  0  0  0  0  0
    0.0775    0.3434    0.0000 C   0  0  0  0  0  0  0  0  0  0  0  0
   -0.7206    0.1343    0.0000 N   0  0  0  0  0  0  0  0  0  0  0  0
    0.1093   -0.8765    0.0000 C   0  0  0  0  0  0  0  0  0  0  0  0
    1.2869   -0.1576    0.0000 C   0  0  0  0  0  0  0  0  0  0  0  0
    1.6994   -0.8721    0.0000 C   0  0  0  0  0  0  0  0  0  0  0  0
    0.9061   -0.6630    0.0000 C   0  0  0  0  0  0  0  0  0  0  0  0
   -0.3032    0.6630    0.0000 C   0  0  0  0  0  0  0  0  0  0  0  0
    0.9162    0.5775    0.0000 O   0  0  0  0  0  0  0  0  0  0  0  0
    1.2869    0.6674    0.0000 H   0  0  0  0  0  0  0  0  0  0  0  0
    0.4936    0.8765    0.0000 C   0  0  0  0  0  0  0  0  0  0  0  0
    0.0775    1.1684    0.0000 H   0  0  0  0  0  0  0  0  0  0  0  0
    0.4936    1.7015    0.0000 O   0  0  0  0  0  0  0  0  0  0  0  0
   -1.6847   -0.9545    0.0000 H   0  0  0  0  0  0  0  0  0  0  0  0
    0.1093   -1.7015    0.0000 H   0  0  0  0  0  0  0  0  0  0  0  0
    0.4900   -1.1961    0.0000 H   0  0  0  0  0  0  0  0  0  0  0  0
    1.6994   -1.6971    0.0000 O   0  0  0  0  0  0  0  0  0  0  0  0
    1.1628   -0.9930    0.0000 H   0  0  0  0  0  0  0  0  0  0  0  0
    1.6990   -0.2918    0.0000 H   0  0  0  0  0  0  0  0  0  0  0  0
    0.4306    0.1620    0.0000 O   0  0  0  0  0  0  0  0  0  0  0  0
   -1.0177    1.0755    0.0000 H   0  0  0  0  0  0  0  0  0  0  0  0
   -0.9410    0.5538    0.0000 H   0  0  0  0  0  0  0  0  0  0  0  0
   -2.2283    0.7559    0.0000 N   0  3  0  0  0  0  0  0  0  0  0  0
   -0.5182   -0.7249    0.0000 O   0  0  0  0  0  0  0  0  0  0  0  0
   -0.5168    1.4599    0.0000 O   0  0  0  0  0  0  0  0  0  0  0  0
    2.2283   -0.8567    0.0000 C   0  0  0  0  0  0  0  0  0  0  0  0
    1.6449   -0.2734    0.0000 O   0  0  0  0  0  0  0  0  0  0  0  0
  1  2  1  0      
  2  3  1  0      
  3  4  1  0      
  4  5  1  0      
  5  6  1  0      
  6  1  1  0      
  3  7  1  0      
  4  8  1  0      
  8  9  1  0      
 10  9  1  0      
  3 11  1  0      
 10 12  1  0      
  8 13  1  0      
 12 14  1  0      
  5 15  1  0      
 14 11  1  0      
 14 16  2  0      
  2 17  1  0      
  7 18  1  0      
  4 19  1  0      
 10  7  1  0      
  9 20  1  0      
 21 10  1  0      
 22  8  1  0      
 23  5  1  0      
 11 24  1  1      
 25  6  1  0      
  1 26  2  0      
 27  7  1  0      
 11 28  1  6      
  9 29  1  0      
 29 30  1  0      
M  CHG  1  26   1
M  STY  1   1 SUP
M  SLB  1   1   1
M  SAL   1  2  29  30
M  SBL   1  1  31
M  SMT   1 CH2OH
M  SBV   1 31   -6.0211    4.8622
M  END
