# Supplementary material for: First Identification of 5,11-Dideoxytetrodotoxin in Marine Animals, and Characterization of Major Fragment Ions of Tetrodotoxin and Its Analogs by High Resolution ESI-MS/MS
Source: MDPI journal article supplement (doi:10.3390/md11082799), 2013-08-06
Supplement: s11 [file s11]

marinedrugs-11-02799-s006.mol
  ChemDraw12271311462D

 29 31  0  0  0  0  0  0  0  0999 V2000
   -1.5411    0.3434    0.0000 C   0  0  0  0  0  0  0  0  0  0  0  0
   -1.1286   -0.3711    0.0000 N   0  0  0  0  0  0  0  0  0  0  0  0
   -0.3305   -0.1620    0.0000 C   0  0  0  0  0  0  0  0  0  0  0  0
    0.4628   -0.3711    0.0000 C   0  0  0  0  0  0  0  0  0  0  0  0
    0.0503    0.3434    0.0000 C   0  0  0  0  0  0  0  0  0  0  0  0
   -0.7478    0.1343    0.0000 N   0  0  0  0  0  0  0  0  0  0  0  0
    0.0820   -0.8765    0.0000 C   0  0  0  0  0  0  0  0  0  0  0  0
    1.2597   -0.1576    0.0000 C   0  0  0  0  0  0  0  0  0  0  0  0
    1.6722   -0.8721    0.0000 C   0  0  0  0  0  0  0  0  0  0  0  0
    0.8789   -0.6630    0.0000 C   0  0  0  0  0  0  0  0  0  0  0  0
   -0.3305    0.6630    0.0000 C   0  0  0  0  0  0  0  0  0  0  0  0
    0.8890    0.5775    0.0000 O   0  0  0  0  0  0  0  0  0  0  0  0
    1.2597    0.6674    0.0000 H   0  0  0  0  0  0  0  0  0  0  0  0
    0.4664    0.8765    0.0000 C   0  0  0  0  0  0  0  0  0  0  0  0
    0.0503    1.1684    0.0000 H   0  0  0  0  0  0  0  0  0  0  0  0
    0.4664    1.7015    0.0000 O   0  0  0  0  0  0  0  0  0  0  0  0
   -1.7119   -0.9545    0.0000 H   0  0  0  0  0  0  0  0  0  0  0  0
    0.0820   -1.7015    0.0000 H   0  0  0  0  0  0  0  0  0  0  0  0
    0.4628   -1.1961    0.0000 H   0  0  0  0  0  0  0  0  0  0  0  0
    1.6722   -1.6971    0.0000 O   0  0  0  0  0  0  0  0  0  0  0  0
    2.2555   -0.2887    0.0000 C   0  0  0  0  0  0  0  0  0  0  0  0
    1.1356   -0.9930    0.0000 H   0  0  0  0  0  0  0  0  0  0  0  0
    1.6718   -0.2918    0.0000 H   0  0  0  0  0  0  0  0  0  0  0  0
    0.4034    0.1620    0.0000 O   0  0  0  0  0  0  0  0  0  0  0  0
   -1.0449    1.0755    0.0000 H   0  0  0  0  0  0  0  0  0  0  0  0
   -0.9682    0.5538    0.0000 H   0  0  0  0  0  0  0  0  0  0  0  0
   -2.2555    0.7559    0.0000 N   0  3  0  0  0  0  0  0  0  0  0  0
   -0.5454   -0.7249    0.0000 O   0  0  0  0  0  0  0  0  0  0  0  0
   -0.5440    1.4599    0.0000 O   0  0  0  0  0  0  0  0  0  0  0  0
  1  2  1  0      
  2  3  1  0      
  3  4  1  0      
  4  5  1  0      
  5  6  1  0      
  6  1  1  0      
  3  7  1  0      
  4  8  1  0      
  8  9  1  0      
 10  9  1  0      
  3 11  1  0      
 10 12  1  0      
  8 13  1  0      
 12 14  1  0      
  5 15  1  0      
 14 11  1  0      
 14 16  2  0      
  2 17  1  0      
  7 18  1  0      
  4 19  1  0      
 10  7  1  0      
  9 20  1  0      
  9 21  1  0      
 22 10  1  0      
 23  8  1  0      
 24  5  1  0      
 11 25  1  1      
 26  6  1  0      
  1 27  2  0      
 28  7  1  0      
 11 29  1  6      
M  CHG  1  27   1
M  END
