# Supplementary material for: First Identification of 5,11-Dideoxytetrodotoxin in Marine Animals, and Characterization of Major Fragment Ions of Tetrodotoxin and Its Analogs by High Resolution ESI-MS/MS
Source: MDPI journal article supplement (doi:10.3390/md11082799), 2013-08-06
Supplement: s12 [file s12]

marinedrugs-11-02799-s006.mol
  corina  04141402583D 1   1.00000     0.00000 
CORINA 3.49 0023  12.04.2013
 29 31  0  0  0  0  0  0  0  0999 V2000
    1.0929    1.5878   -0.5092 C   0  0  0  0  0  0  0  0  0  0  0  0
    0.9600    0.1789   -0.5123 N   0  0  0  0  0  0  0  0  0  0  0  0
    1.4989   -0.5745    0.6785 C   0  0  0  0  0  0  0  0  0  0  0  0
    2.9064   -0.0835    0.9114 C   0  0  0  0  0  0  0  0  0  0  0  0
    2.9632    1.4420    1.0517 C   0  0  0  0  0  0  0  0  0  0  0  0
    2.4407    1.9814   -0.2060 N   0  0  0  0  0  0  0  0  0  0  0  0
    0.6539   -0.3242    1.8945 C   0  0  0  0  0  0  0  0  0  0  0  0
    3.4629   -0.8215    2.1444 C   0  0  0  0  0  0  0  0  0  0  0  0
    2.5975   -0.7262    3.3972 C   0  0  0  0  0  0  0  0  0  0  0  0
    1.1690   -1.1844    3.0084 C   0  0  0  0  0  0  0  0  0  0  0  0
    1.4449   -2.0852    0.3213 C   0  0  0  0  0  0  0  0  0  0  0  0
    1.1940   -2.5097    2.7094 O   0  0  0  0  0  0  0  0  0  0  0  0
    3.7402   -1.8497    1.8865 H   0  0  0  0  0  0  0  0  0  0  0  0
    1.4112   -2.9956    1.5279 C   0  0  0  0  0  0  0  0  0  0  0  0
    2.4221    1.8229    1.8968 H   0  0  0  0  0  0  0  0  0  0  0  0
    1.6717   -4.1252    1.3368 O   0  0  0  0  0  0  0  0  0  0  0  0
    0.4228   -0.2794   -1.2316 H   0  0  0  0  0  0  0  0  0  0  0  0
    0.6067    0.7320    2.1825 H   0  0  0  0  0  0  0  0  0  0  0  0
    3.5080   -0.3674   -0.0121 H   0  0  0  0  0  0  0  0  0  0  0  0
    3.2069   -1.7283    4.2717 O   0  0  0  0  0  0  0  0  0  0  0  0
    2.6722    0.6551    4.0278 C   0  0  0  0  0  0  0  0  0  0  0  0
    0.5495   -0.9451    3.9397 H   0  0  0  0  0  0  0  0  0  0  0  0
    4.4351   -0.3140    2.3777 H   0  0  0  0  0  0  0  0  0  0  0  0
    4.3842    1.8541    1.0713 O   0  0  0  0  0  0  0  0  0  0  0  0
    2.4239   -2.2399   -0.2717 H   0  0  0  0  0  0  0  0  0  0  0  0
    2.9218    2.5591   -0.7773 H   0  0  0  0  0  0  0  0  0  0  0  0
    0.1857    2.4353   -0.7533 N   0  3  0  0  0  0  0  0  0  0  0  0
   -0.7703   -0.6825    1.6689 O   0  0  0  0  0  0  0  0  0  0  0  0
    0.2902   -2.3682   -0.5353 O   0  0  0  0  0  0  0  0  0  0  0  0
  1  2  1  0      
  2  3  1  0      
  3  4  1  0      
  4  5  1  0      
  5  6  1  0      
  6  1  1  0      
  3  7  1  0      
  4  8  1  0      
  8  9  1  0      
 10  9  1  0      
  3 11  1  0      
 10 12  1  0      
  8 13  1  0      
 12 14  1  0      
  5 15  1  0      
 14 11  1  0      
 14 16  2  0      
  2 17  1  0      
  7 18  1  0      
  4 19  1  0      
 10  7  1  0      
  9 20  1  0      
  9 21  1  0      
 22 10  1  0      
 23  8  1  0      
 24  5  1  0      
 11 25  1  0      
 26  6  1  0      
  1 27  2  0      
 28  7  1  0      
 11 29  1  0      
M  CHG  1  27   1
M  END
$$$$
