# Supplementary material for: First Identification of 5,11-Dideoxytetrodotoxin in Marine Animals, and Characterization of Major Fragment Ions of Tetrodotoxin and Its Analogs by High Resolution ESI-MS/MS
Source: MDPI journal article supplement (doi:10.3390/md11082799), 2013-08-06
Supplement: s15 [file s15]

marinedrugs-11-02799-s008.mol
  corina  04141402593D 1   1.00000     0.00000 
CORINA 3.49 0023  12.04.2013
 29 31  0  0  0  0  0  0  0  0999 V2000
    0.9064    1.5638   -0.4532 C   0  0  0  0  0  0  0  0  0  0  0  0
    0.7810    0.1795   -0.4512 N   0  0  0  0  0  0  0  0  0  0  0  0
    1.3874   -0.5514    0.6776 C   0  0  0  0  0  0  0  0  0  0  0  0
    2.8207   -0.0457    0.8738 C   0  0  0  0  0  0  0  0  0  0  0  0
    2.8543    1.4765    0.9794 C   0  0  0  0  0  0  0  0  0  0  0  0
    2.1928    2.0344   -0.2205 N   0  0  0  0  0  0  0  0  0  0  0  0
    0.5799   -0.2808    1.9433 C   0  0  0  0  0  0  0  0  0  0  0  0
    3.4763   -0.7200    2.0682 C   0  0  0  0  0  0  0  0  0  0  0  0
    2.6443   -0.6710    3.3394 C   0  0  0  0  0  0  0  0  0  0  0  0
    1.1934   -1.0724    3.0976 C   0  0  0  0  0  0  0  0  0  0  0  0
    1.4142   -2.0385    0.3470 C   0  0  0  0  0  0  0  0  0  0  0  0
    1.1243   -2.4855    2.7999 O   0  0  0  0  0  0  0  0  0  0  0  0
    3.6793   -1.7685    1.8146 H   0  0  0  0  0  0  0  0  0  0  0  0
    1.2481   -2.9249    1.5492 C   0  0  0  0  0  0  0  0  0  0  0  0
    2.3096    1.8243    1.8525 H   0  0  0  0  0  0  0  0  0  0  0  0
    1.2246   -4.1400    1.3675 O   0  0  0  0  0  0  0  0  0  0  0  0
    0.3139   -0.2708   -1.1689 H   0  0  0  0  0  0  0  0  0  0  0  0
    0.5954    0.7850    2.1724 H   0  0  0  0  0  0  0  0  0  0  0  0
    3.3923   -0.3308   -0.0266 H   0  0  0  0  0  0  0  0  0  0  0  0
    3.0722   -1.4317    4.0315 H   0  0  0  0  0  0  0  0  0  0  0  0
    2.7432    0.6702    4.0526 C   0  0  0  0  0  0  0  0  0  0  0  0
    0.6137   -0.8713    4.0094 H   0  0  0  0  0  0  0  0  0  0  0  0
    4.4454   -0.2412    2.2581 H   0  0  0  0  0  0  0  0  0  0  0  0
    4.2061    1.9364    1.0274 O   0  0  0  0  0  0  0  0  0  0  0  0
    2.3803   -2.2712   -0.1315 H   0  0  0  0  0  0  0  0  0  0  0  0
    2.6241    2.6740   -0.7937 H   0  0  0  0  0  0  0  0  0  0  0  0
   -0.0997    2.3577   -0.6619 N   0  3  0  0  0  0  0  0  0  0  0  0
   -0.7762   -0.6931    1.7473 O   0  0  0  0  0  0  0  0  0  0  0  0
    0.3828   -2.3472   -0.6028 O   0  0  0  0  0  0  0  0  0  0  0  0
  1  2  1  0      
  2  3  1  0      
  3  4  1  0      
  4  5  1  0      
  5  6  1  0      
  6  1  1  0      
  3  7  1  0      
  4  8  1  0      
  8  9  1  0      
 10  9  1  0      
  3 11  1  0      
 10 12  1  0      
  8 13  1  0      
 12 14  1  0      
  5 15  1  0      
 14 11  1  0      
 14 16  2  0      
  2 17  1  0      
  7 18  1  0      
  4 19  1  0      
 10  7  1  0      
  9 20  1  0      
  9 21  1  0      
 22 10  1  0      
 23  8  1  0      
 24  5  1  0      
 11 25  1  0      
 26  6  1  0      
  1 27  2  0      
 28  7  1  0      
 11 29  1  0      
M  CHG  1  27   1
M  END
$$$$
